# Supplementary material for: Measurement of Waist Circumference
Source: Oxford University Press journal article supplement (doi:10.2337/dc12-1452), 2012-12-29
Supplement: dc121452supplementarydata.pdf [file dc121452supplementarydata.pdf]

# SUPPLEMENTARY DATA

**Supplementary Table 1.** Relationship between WC-IC and WC-mid and metabolic variables in subjects without medications.

|                                                   | Men    |        |         | Women  |        |         |
|---------------------------------------------------|--------|--------|---------|--------|--------|---------|
|                                                   | number | WC-IC  | WC-mid  | Number | WC-IC  | WC-mid  |
| Systolic blood pressure <sup>a</sup>              | 623    | 0.23*  | 0.27*†  | 994    | 0.34*  | 0.39*†  |
| Diastolic blood pressure <sup>a</sup>             | 623    | 0.26*  | 0.28*   | 994    | 0.32*  | 0.35*   |
| Fasting plasma glucose <sup>b</sup>               | 737    | 0.07*  | 0.15*†  | 1127   | 0.18*  | 0.24*†  |
| OGTT 2-hour plasma glucose <sup>b</sup>           | 736    | 0.16*  | 0.22*†  | 1119   | 0.25*  | 0.29*†  |
| Hemoglobin A1c <sup>b</sup>                       | 737    | 0.15*  | 0.20*†  | 1127   | 0.20*  | 0.26*†  |
| Total cholesterol <sup>c</sup>                    | 731    | 0.04   | 0.05    | 1124   | 0.15*  | 0.16*   |
| Triglyceride‡ <sup>c</sup>                        | 731    | 0.29*  | 0.37*†  | 1124   | 0.28*  | 0.37*†  |
| HDL-cholesterol <sup>c</sup>                      | 731    | −0.23* | −0.29*† | 1124   | −0.17* | −0.25*† |
| LDL-cholesterol <sup>c</sup>                      | 731    | 0.07   | 0.09*   | 1124   | 0.2*   | 0.21*   |
| High-sensitivity C-reactive protein‡ <sup>d</sup> | 713    | 0.22*  | 0.29*†  | 1114   | 0.33*  | 0.42*†  |

WC-IC, waist circumference at the horizontal plane of the superior border of the iliac crest. WC-mid, waist circumference in the horizontal plane the midway between the lowest rib and the iliac crest.

Pearson's correlation coefficients are shown.

<sup>a</sup> Analyses in subjects without medications for hypertension.

<sup>b</sup> Analyses in subjects without medications for diabetes.

<sup>c</sup> Analyses in subjects without medications for dyslipidemia.

<sup>d</sup> Analyses in subjects without medications for diabetes and dyslipidemia.

\*  $p < 0.05$  for the relationship between WC-IC or WC-mid and metabolic variables.

†  $p < 0.05$  vs. the correlation coefficients of WC-IC and metabolic variables.

‡ Variables were logarithmically transformed for the analyses.

# SUPPLEMENTARY DATA

**Supplementary Table 2.** Performance of WC-IC and WC-mid for identifying or predicting metabolic disease in both genders.

|                               | To identify disease |                   | To predict disease |                    |
|-------------------------------|---------------------|-------------------|--------------------|--------------------|
| AUC (95% CI)                  | WC-IC               | WC-mid            | WC-IC              | WC-mid             |
| Men                           |                     |                   |                    |                    |
| Hypertension                  | 0.63 (0.59–0.67)    | 0.64 (0.6–0.68)   | 0.61 (0.52–0.7)    | 0.61 (0.52–0.71)   |
| Diabetes mellitus             | 0.62 (0.57–0.67)    | 0.66 (0.61–0.71)* | 0.54 (0.42–0.66)   | 0.57 (0.44–0.7)    |
| ≥2 MS components <sup>a</sup> | 0.66 (0.62–0.7)     | 0.70 (0.66–0.74)* | 0.62 (0.53–0.71)   | 0.62 (0.53–0.7)    |
| Women                         |                     |                   |                    |                    |
| Hypertension                  | 0.69 (0.65–0.72)    | 0.72 (0.68–0.75)† | 0.7 (0.62–0.77)    | 0.65 (0.57–0.73) † |
| Diabetes mellitus             | 0.7 (0.65–0.75)     | 0.72 (0.68–0.77)  | 0.69 (0.61–0.76)   | 0.74 (0.67–0.81) † |
| ≥2 MS components <sup>a</sup> | 0.68 (0.65–0.72)    | 0.73 (0.7–0.76)*  | 0.65 (0.59–0.71)   | 0.68 (0.63–0.74)   |

AUC, area under the area under the receiver-operator curve (ROC); WC-IC, waist circumference in the horizontal plane at the superior border of the iliac crest; WC-mid, waist circumference in the horizontal plane midway between the lowest rib and the iliac crest.

<sup>a</sup> Clustering of 2 or more components of metabolic syndrome including fasting plasma glucose ≥100 mg/dL, blood pressure ≥130/85 mmHg, triglyceride level ≥150 mg/dL, and low HDL-cholesterol level (<40 mg/dL in men; <50 mg/dL in women). Subjects taking medications for hypertension, diabetes, or dyslipidemia were considered as meeting the corresponding criteria.

\*  $p < 0.05$  vs. AUC of WC-IC; †  $0.05 < p < 0.1$  vs. AUC of WC-IC; all  $p$  values were age-adjusted

SUPPLEMENTARY DATA

**Supplementary Table 3.** Different definitions of central obesity for identifying or predicting metabolic disease in both genders.

|                                                                       |              | To identify disease |                     |                                    |                     | To predict disease  |                     |                     |                     |
|-----------------------------------------------------------------------|--------------|---------------------|---------------------|------------------------------------|---------------------|---------------------|---------------------|---------------------|---------------------|
|                                                                       |              | WC-IC               |                     | WC-mid                             |                     | WC-IC               |                     | WC-mid              |                     |
| Hypertension                                                          |              |                     |                     |                                    |                     |                     |                     |                     |                     |
| Cutoff (M/F, cm)                                                      |              | 90/80               | 88/83               | 90/80                              | 87/78               | 90/80               | 89/84               | 90/80               | 90/77               |
| Men                                                                   | AUC (95% CI) | 0.59<br>(0.55–0.62) | 0.61<br>(0.57–0.64) | 0.59<br>(0.55–0.62)                | 0.60<br>(0.57–0.64) | 0.55<br>(0.47–0.64) | 0.56<br>(0.47–0.64) | 0.58<br>(0.49–0.66) | 0.58<br>(0.49–0.66) |
|                                                                       | Sensitivity  | 62%                 | 75%                 | 55%                                | 71%                 | 54%                 | 60%                 | 49%                 | 49%                 |
|                                                                       | Specificity  | 56%                 | 46%                 | 62%                                | 49%                 | 57%                 | 52%                 | 66%                 | 66%                 |
| Women                                                                 | AUC (95% CI) | 0.62<br>(0.59–0.65) | 0.64<br>(0.61–0.67) | <b>0.64*</b><br><b>(0.61–0.68)</b> | 0.66<br>(0.63–0.7)  | 0.61<br>(0.55–0.67) | 0.65<br>(0.59–0.72) | 0.61<br>(0.54–0.68) | 0.61<br>(0.54–0.68) |
|                                                                       | Sensitivity  | 81%                 | 71%                 | 60%                                | 72%                 | 82%                 | 70%                 | 48%                 | 60%                 |
|                                                                       | Specificity  | 43%                 | 57%                 | 69%                                | 61%                 | 40%                 | 61%                 | 74%                 | 62%                 |
| Diabetes                                                              |              |                     |                     |                                    |                     |                     |                     |                     |                     |
| Cutoff (M/F, cm)                                                      |              | 90/80               | 90/84               | 90/80                              | 88/79               | 90/80               | 90/84               | 90/80               | 89/80               |
| Men                                                                   | AUC (95% CI) | 0.61<br>(0.56–0.65) | 0.61<br>(0.56–0.65) | 0.62<br>(0.57–0.66)                | 0.63<br>(0.59–0.67) | 0.56<br>(0.46–0.67) | 0.56<br>(0.46–0.67) | 0.57<br>(0.47–0.68) | 0.58<br>(0.47–0.68) |
|                                                                       | Sensitivity  | 68%                 | 68%                 | 64%                                | 76%                 | 60%                 | 60%                 | 52%                 | 56%                 |
|                                                                       | Specificity  | 53%                 | 53%                 | 59%                                | 50%                 | 53%                 | 53%                 | 63%                 | 59%                 |
| Women                                                                 | AUC (95% CI) | 0.6<br>(0.56–0.64)  | 0.66<br>(0.62–0.71) | <b>0.66*</b><br><b>(0.61–0.7)</b>  | 0.67<br>(0.62–0.71) | 0.64<br>(0.59–0.69) | 0.63<br>(0.55–0.71) | 0.65<br>(0.57–0.74) | 0.65<br>(0.57–0.74) |
|                                                                       | Sensitivity  | 81%                 | 75%                 | 66%                                | 72%                 | 91%                 | 69%                 | 60%                 | 60%                 |
|                                                                       | Specificity  | 40%                 | 58%                 | 65%                                | 61%                 | 37%                 | 57%                 | 71%                 | 71%                 |
| Clustering of 2 or more components of metabolic syndrome <sup>a</sup> |              |                     |                     |                                    |                     |                     |                     |                     |                     |
| Cutoff (M/F, cm)                                                      |              | 90/80               | 89/84               | 90/80                              | 89/78               | 90/80               | 91/84               | 90/80               | 85/76               |
| Men                                                                   | AUC (95% CI) | 0.62<br>(0.58–0.65) | 0.61<br>(0.57–0.64) | <b>0.64*</b><br><b>(0.61–0.68)</b> | 0.66<br>(0.62–0.69) | 0.57<br>(0.5–0.65)  | 0.59<br>(0.52–0.67) | 0.6<br>(0.53–0.67)  | 0.59<br>(0.51–0.66) |
|                                                                       | Sensitivity  | 63%                 | 56%                 | 60%                                | 65%                 | 52%                 | 49%                 | 43%                 | 62%                 |
|                                                                       | Specificity  | 60%                 | 65%                 | 69%                                | 66%                 | 63%                 | 70%                 | 77%                 | 56%                 |
| Women                                                                 | AUC (95% CI) | 0.61<br>(0.58–0.64) | 0.64<br>(0.61–0.67) | <b>0.66*</b><br><b>(0.63–0.69)</b> | 0.67<br>(0.64–0.7)  | 0.62<br>(0.58–0.67) | 0.6<br>(0.55–0.66)  | 0.62<br>(0.56–0.67) | 0.64<br>(0.59–0.7)  |
|                                                                       | Sensitivity  | 78%                 | 65%                 | 60%                                | 71%                 | 81%                 | 57%                 | 45%                 | 65%                 |
|                                                                       | Specificity  | 44%                 | 62%                 | 71%                                | 64%                 | 44%                 | 63%                 | 78%                 | 64%                 |

AUC, area under the area under the receiver-operator curve (ROC); WC-IC, waist circumference in the horizontal plane of the superior border of the iliac crest; WC-mid, waist circumference in the horizontal plane midway between the lowest rib and the iliac crest.

<sup>a</sup> Clustering of 2 or more components of metabolic syndrome including fasting plasma glucose  $\geq 100$  mg/dL, blood pressure  $\geq 130/85$  mmHg, triglyceride level  $\geq 150$  mg/dL, and low HDL-C ( $< 40$  mg/dL in

## SUPPLEMENTARY DATA

men; <50 mg/dL in women). Subjects taking medications for hypertension, diabetes, or dyslipidemia were considered as meeting the corresponding criteria.

\* Age-adjusted  $p < 0.05$  AUC of WC-mid at 90/80 vs. AUC of WC-IC at 90/80 cm.

†  $0.05 < \text{age-adjusted } p < 0.1$  AUC of WC-mid at 90/80 vs. AUC of WC-IC at 90/80 cm.
